# Supplementary material for: Induction of Type I Interferon through a Noncanonical Toll-Like Receptor 7 Pathway during Yersinia pestis Infection
Source: PubMed Central journal article supplement (PMC5649010; doi:10.1128/iai.00570-17), 2017-10-18
Supplement: IAI.00570-17_zii999092200s1.pdf [file IAI.00570-17_zii999092200s1.pdf]

1 **Supplemental Information.**

2 *Induction of type I interferon through a non-canonical Toll-like receptor 7 pathway during*

3 *Yersinia pestis* infection

4 Dhariwala, et al

5

6 **Supplemental Figure Legends.**

7 **Supplemental Figure S1.** *Intracellular Y. pestis stimulates IFN $\beta$  expression in macrophages.*

8 (A) RAW 264.7 cells were infected with *Y. pestis* T3SS+ or T3SS- followed by treatment with

9 cytochalasin D to block phagocytosis; IFN $\beta$  was detected by ELISA at 4 HPI. (B) L929

10 fibroblasts were infected with *Y. pestis* T3SS+pgm- at MOI of 20 and the indicated mRNA was

11 quantified by real time PCR at 2 HPI. Data shown are representative of 2-3 independent trials;

12 error bars show standard deviation from the mean; data were analyzed by Student's t-test,

13 \*P<0.05, nd: not detected.

14 **Supplemental Figure S2.** *Extracellular Y. pestis KIM suppress IFN $\beta$  expression by*

15 *macrophages.* RAW 264.7 macrophages were infected with (A) virulent wild type CO92

16 (T3SS+, pgm+), (B), KIM D27 (T3SS+, pgm-) or (A-B) KIM6 (T3SS-, pgm-) *Y. pestis* at a

17 multiplicity of infection (MOI) of 20; mock cells were not infected. After 30 min, gentamicin

18 was added to kill extracellular bacteria and the intracellular infection continued; IFN $\beta$  was

19 quantified in the culture supernatant by ELISA at 4 HPI. Data shown are representative of 2-3

20 independent trials; error bars show standard deviation from the mean; data were analyzed by

21 Student's t-test, \*P<0.05, nd: not detected.

22 **Supplemental Figure S3.** *Less severe pathology in the spleens of Tlr7<sup>-/-</sup> mice on day 5 following*

23 *infection by Y. pestis KIM D27.* Groups of 5-8 WT (A,C) and Tlr7<sup>-/-</sup> (B,D) mice were challenged

24 by intranasal infection with *Y. pestis* KIM D27 (T3SS+pgm<sup>-</sup>). On day 5 post-infection, animals  
25 were euthanized and formalin-fixed lungs (A-B) and spleens (C-D) were sectioned, stained with  
26 hematoxylin and eosin and analyzed by histopathology. Representative lesions are shown for  
27 WT (n=6) and *Tlr7*<sup>-/-</sup> (n=10); collected in two independent trials); boxes outline the zoomed in  
28 areas shown in the lower panels; arrows point to bacterial microcolonies; N: necrosis, N/I:  
29 neutrophilic inflammation, H: hemorrhage, E: exudate. Scale bar indicates 100 μm (50 μm in the  
30 zoomed-in images).

31 **Supplemental Figure S4.** *Similar pathology in the spleens of Tlr7<sup>-/-</sup> mice on day 3 following*  
32 *infection by Y. pestis CO92.* Groups of 5 WT (A) or *Tlr7*<sup>-/-</sup> (B) mice were challenged by  
33 intranasal infection with 1x10<sup>3</sup> CFU *Y. pestis* CO92 (T3SS<sup>+</sup>, pgm<sup>+</sup>). On day 3 post-infection,  
34 animals were euthanized and formalin-fixed spleens were sectioned, stained with hematoxylin  
35 and eosin and analyzed by histopathology. Representative lesions are shown; boxes outline the  
36 zoomed in areas shown in the lower panels. Scale bar indicates 100 μm (50 μm in the zoomed-in  
37 images).

38

39

40

41 Supplemental Fig S1

42

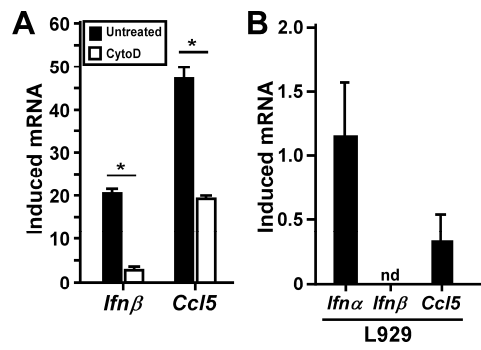

43

44

45

46 Supplemental Figure S2

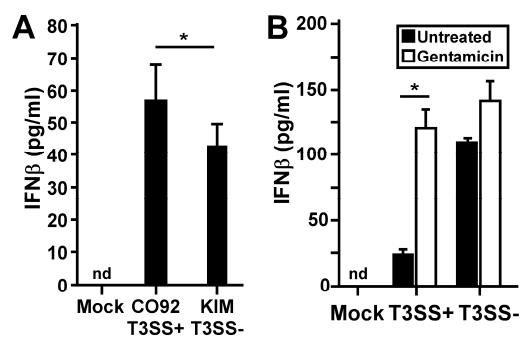

49 Supplemental Fig S3

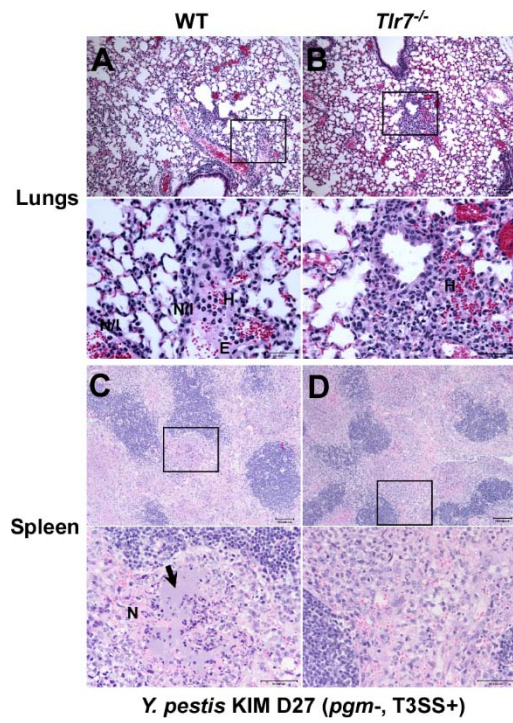

50

51

52 Supplemental Fig S4

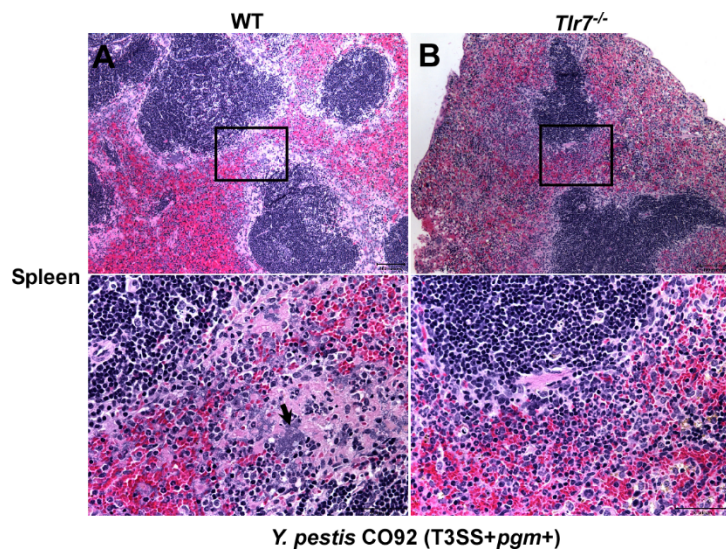

53

54

55
